# Supplementary material
Source: PubMed Central journal article supplement (PMC6433436)
Supplement: nyx316_supp.pdf [file nyx316_supp.pdf]

Supplementary Table 1: TCGA patients with known mutations in *TP53*, *EGFR*, and *PTEN* genes.

| Patient ID      | <i>TP53</i>       | <i>EGFR</i>       | <i>PTEN</i> |
|-----------------|-------------------|-------------------|-------------|
| TCGA-06-0129-01 | R248Q             | WT                | WT          |
| TCGA-06-0128-01 | S313Afs*32        | WT                | WT          |
| TCGA-06-0142-01 | WT                | A289V             | WT          |
| TCGA-06-0189-01 | R175H             | WT                | WT          |
| TCGA-06-0137-01 | WT                | P596L             | WT          |
| TCGA-19-1390-01 | L194R,L130F       | WT                | WT          |
| TCGA-06-0184-01 | R158H             | WT                | G36E        |
| TCGA-02-0006-01 | WT                | WT                | WT          |
| TCGA-76-6661-01 | WT                | H304Y             | H272P       |
| TCGA-76-6662-01 | A138T             | WT                | R233*       |
| TCGA-76-6663-01 | R248L             | WT                | WT          |
| TCGA-76-6664-01 | R248W             | WT                | X85_splice  |
| TCGA-06-0213-01 | WT                | WT                | R335*       |
| TCGA-06-5417-01 | R196*,I255S       | WT                | WT          |
| TCGA-06-6389-01 | Y220C             | WT                | WT          |
| TCGA-06-0185-01 | WT                | V651M             | WT          |
| TCGA-06-0241-01 | R248Q             | WT                | WT          |
| TCGA-06-2570-01 | Q136E             | WT                | WT          |
| TCGA-12-0616-01 | WT                | G598V             | WT          |
| TCGA-76-4935-01 | WT                | WT                | T319Kfs*24  |
| TCGA-06-0168-01 | WT                | WT                | A328*       |
| TCGA-06-0238-01 | N239_S241del      | WT                | WT          |
| TCGA-14-1456-01 | Y220C             | A289V             | WT          |
| TCGA-06-0188-01 | X307_splice       | WT                | N323Mfs*21  |
| TCGA-06-0192-01 | WT                | WT                | Y315*       |
| TCGA-76-6191-01 | WT                | C620W             | L25V        |
| TCGA-76-6282-01 | WT                | C571S             | WT          |
| TCGA-76-6192-01 | WT                | WT                | X268_splice |
| TCGA-06-0154-01 | WT                | R222C             | WT          |
| TCGA-06-0158-01 | WT                | R108K,P596S,G598A | WT          |
| TCGA-06-5412-01 | WT                | WT                | A328Qfs*16  |
| TCGA-02-0033-01 | R248Q             | WT                | WT          |
| TCGA-06-0166-01 | WT                | WT                | T167S       |
| TCGA-06-5413-01 | WT                | V843L             | WT          |
| TCGA-12-3650-01 | WT                | A289V,R427L       | WT          |
| TCGA-19-2624-01 | WT                | G63K              | WT          |
| TCGA-76-6193-01 | T155N,G244S,R156C | WT                | WT          |
| TCGA-76-4926-01 | WT                | R222C             | WT          |
| TCGA-06-0649-01 | WT                | G331R             | R130G       |

|                 |             |       |      |
|-----------------|-------------|-------|------|
| TCGA-14-0789-01 | WT          | C628Y | WT   |
| TCGA-76-4934-01 | R273H       | WT    | Y88H |
| TCGA-02-0003-01 | H178Q,R282W | C620Y | WT   |
| TCGA-06-0190-02 | G245S       | WT    | D92E |
| TCGA-76-6656-01 | WT          | C240Y | WT   |

Supplementary Table 2: TP53 regulated genes and their expression fold change in *TP53* mutant vs WT analysis.

| Gene Symbol | Fold Change ( <i>TP53</i> mutant vs WT) | p-value     |
|-------------|-----------------------------------------|-------------|
| ACSL3       | -2.285919495                            | 0.025394921 |
| ACTN1       | -2.614479614                            | 0.01119776  |
| ADD3        | 2.235683112                             | 0.042191562 |
| CD97        | -2.780388873                            | 0.015596881 |
| AMOTL2      | 2.824723826                             | 0.019396121 |
| ANTXR1      | 3.203498153                             | 0.0019996   |
| ANXA1       | -2.199399113                            | 0.041191762 |
| ANXA2       | -2.425040444                            | 0.016796641 |
| ATP1A1      | -2.404396965                            | 0.031793641 |
| BBC3        | -2.915645279                            | 0.00759848  |
| BHLHB2      | -2.170743262                            | 0.048390322 |
| C9orf116    | -3.243564615                            | 0.00979804  |
| CAMK2B      | -4.639728855                            | 0.00059988  |
| CAPNS1      | -2.486643155                            | 0.017396521 |
| CAT         | 2.291855586                             | 0.022795441 |
| CCL4        | 3.299427933                             | 0.00239952  |
| CD44        | -2.15074474                             | 0.045390922 |
| CDC7        | 2.366179064                             | 0.029194161 |
| CDC2        | 2.420800718                             | 0.020995801 |
| CDKN1A      | -3.008690075                            | 0.00759848  |
| CHEK2       | 2.022856349                             | 0.038392322 |
| CLU         | -2.601573157                            | 0.004999    |
| COL9A1      | 2.192399188                             | 0.022395521 |
| CSRP1       | -2.267699565                            | 0.022595481 |
| DCLRE1A     | 2.245231271                             | 0.021595681 |
| DDB2        | -2.810294262                            | 0.016796641 |
| DKK3        | -2.559013531                            | 0.015996801 |
| DLC1        | -2.939445965                            | 0.0069986   |
| DUSP4       | -3.319560089                            | 0.004999    |
| EGFR        | -3.137113429                            | 0.018396321 |
| EPS8        | 2.405965517                             | 0.043191362 |
| F3          | -3.476184172                            | 0.00259948  |
| C1orf183    | 2.088791281                             | 0.047390522 |
| FDFT1       | 2.406773683                             | 0.028394321 |
| FDXR        | -3.023689152                            | 0.01239752  |
| PLEKHC1     | -2.07588678                             | 0.034193161 |
| FOSL1       | -2.785883361                            | 0.020795841 |
| FRMD4A      | 2.009055503                             | 0.033993201 |
| GABPA       | 3.128864082                             | 0.00379924  |
| GADD45A     | -2.779385457                            | 0.00759848  |
| GART        | 2.093171117                             | 0.038792242 |
| GNA14       | -2.288671535                            | 0.040991802 |
| GNAI1       | 2.465851828                             | 0.030593881 |
| GPI         | -2.473823549                            | 0.01219756  |
| H2AFY2      | 2.347633662                             | 0.025194961 |

|           |              |             |
|-----------|--------------|-------------|
| HDAC2     | 2.359043529  | 0.032993401 |
| HRAS      | -2.152130097 | 0.025594881 |
| HRASLS    | 2.601055589  | 0.015996801 |
| HSPB1     | -3.53423492  | 0.00239952  |
| IGFBP2    | -2.394850698 | 0.013197361 |
| IGFBP3    | -2.465073791 | 0.017596481 |
| IL27RA    | -2.389606311 | 0.026194761 |
| ILK       | -2.64359854  | 0.0119976   |
| KCNJ4     | -2.778842436 | 0.015996801 |
| LAMB2     | -2.63969001  | 0.015196961 |
| LGALS3    | -2.608794068 | 0.016196761 |
| MAD2L1    | 2.279124567  | 0.042391522 |
| MAP2K6    | 3.244418545  | 0.0039992   |
| MAP4K2    | -3.146759758 | 0.00579884  |
| MTMR11    | -2.380667239 | 0.029394121 |
| PBEF1     | -2.274325425 | 0.041391722 |
| NEDD8     | -2.329151093 | 0.035192961 |
| NPTX1     | -3.09163211  | 0.00839832  |
| OAT       | 2.073354604  | 0.049990002 |
| PDGFA     | -2.831740636 | 0.0039992   |
| PGM3      | 2.397733669  | 0.028994201 |
| PHLDA3    | -3.581273794 | 0.0019996   |
| PLXNB2    | -2.578868713 | 0.020195961 |
| PPP1R13B  | -2.387128226 | 0.035192961 |
| PRIM1     | 2.907645486  | 0.00819836  |
| PSRC1     | -2.27692516  | 0.00719856  |
| PTCH1     | 2.309241364  | 0.014397121 |
| PPP2R4    | -2.089894496 | 0.040591882 |
| SERPINA3  | -2.190559166 | 0.00519896  |
| SERPINB6  | -2.441319251 | 0.01119776  |
| SERPINE1  | -2.328293313 | 0.033393321 |
| SGK       | 2.995594431  | 0.004999    |
| SLC2A1    | -2.840166816 | 0.0069986   |
| SOCS2     | -2.592730099 | 0.021195761 |
| SREBF1    | -2.939332475 | 0.012797441 |
| SFRS3     | 2.530006208  | 0.017996401 |
| STMN1     | 2.14362038   | 0.047590482 |
| SUMO1     | 2.735640002  | 0.019996001 |
| TAGLN2    | -2.197013401 | 0.030993801 |
| TFAM      | 2.398780994  | 0.018996201 |
| TGFB2     | -2.360288855 | 0.036392721 |
| TGFBR1    | 2.01327967   | 0.047590482 |
| TNFRSF10B | -2.946157779 | 0.00779844  |
| TTK       | 2.447191907  | 0.023195361 |
| UPP1      | -2.157148513 | 0.040991802 |
| VCAN      | 2.441948767  | 0.033393321 |
| WNT7A     | -4.539703641 | 0.0009998   |
| XRCC5     | 3.576308592  | 0.0029994   |

Supplementary Table 3: PTEN regulated genes and their expression fold change in *PTEN* mutant vs WT analysis.

| Gene Symbol | Fold Change ( <i>PTEN</i> mutant vs WT) | p-value     |
|-------------|-----------------------------------------|-------------|
| BCL3        | 2.156713753                             | 0.039192162 |
| C3          | 2.637273986                             | 0.032593481 |
| CDKN1B      | -2.427779561                            | 0.016196761 |
| CEBPA       | 2.29420606                              | 0.049190162 |
| CTSB        | 2.212253726                             | 0.032993401 |
| CTSZ        | 4.219885895                             | 0.00319936  |
| EGFR        | -4.247239724                            | 0.0059988   |
| FDFT1       | -3.084397406                            | 0.01159768  |
| FOXO1       | -2.677219461                            | 0.022195561 |
| IGFBP6      | 3.361639075                             | 0.00279944  |
| IL4R        | 2.630349827                             | 0.012997401 |
| KLHL24      | -3.454062524                            | 0.00279944  |
| RAD51B      | 2.606246334                             | 0.01139772  |
| RUNX1       | 2.778442517                             | 0.013997201 |
| SOCS3       | 2.321623578                             | 0.025394921 |
| TAF10       | 2.733818972                             | 0.038992202 |
| ZBTB16      | -2.223212965                            | 0.029994001 |

Supplementary Table 4: EGFR regulated genes and their expression fold change in *EGFR* mutant vs WT analysis.

| Gene Symbol | Fold Change ( <i>EGFR</i> mutant vs WT) | p-value   |
|-------------|-----------------------------------------|-----------|
| BTC         | -2.464601923                            | 0.0317936 |
| CST3        | 2.269495709                             | 0.0421916 |
| DSC2        | -2.780472844                            | 0.0165967 |
| DUSP4       | 2.246164902                             | 0.0261948 |
| EGFR        | 6.705430388                             | 0.0002    |
| GFAP        | 2.54949414                              | 0.0105979 |
| IL6         | -2.671598208                            | 0.0229954 |
| MATN2       | 2.381614171                             | 0.0277944 |
| PLA2G4A     | -2.31737271                             | 0.0319936 |
| PLCG1       | 2.356276128                             | 0.0303939 |
| SOX9        | 2.546680818                             | 0.014997  |
| SPRY2       | 2.819223652                             | 0.014997  |
| TWIST1      | 2.189158148                             | 0.0369926 |

Supplementary Table 5: Angiogenesis related genes and their expression fold change in *TP53* mutant vs WT analysis.

| Gene Symbol | Fold Change ( <i>TP53</i> mutant vs WT) | p-value   |
|-------------|-----------------------------------------|-----------|
| ABI1        | 2.278176698                             | 0.0361928 |
| ADAMTS6     | 2.350490806                             | 0.0269946 |
| AGT         | -2.259149838                            | 0.0015997 |
| ALCAM       | 2.711432192                             | 0.0229954 |
| ANTXR1      | 3.203498153                             | 0.0019996 |
| ANXA2       | -2.425040444                            | 0.0167966 |
| CENTD3      | -2.204265169                            | 0.0385923 |
| ARNTL       | -2.500215456                            | 0.0245951 |
| BMP2        | 2.083749839                             | 0.0445911 |
| BMP4        | 2.064427072                             | 0.0223955 |
| CALCRL      | 2.718554164                             | 0.0085983 |
| CAPNS1      | -2.486643155                            | 0.0173965 |
| CAT         | 2.291855586                             | 0.0227954 |
| CBL         | 2.145145987                             | 0.0335933 |
| CD151       | -3.1449486                              | 0.004799  |
| CD44        | -2.15074474                             | 0.0453909 |
| CD63        | -3.823129916                            | 0.0027994 |
| CDKN1A      | -3.008690075                            | 0.0075985 |
| CHI3L1      | -3.313510568                            | 0.0019996 |
| CITED1      | -2.549169689                            | 0.0155969 |
| LECT1       | -2.218123071                            | 0.0433913 |
| CNR1        | -2.23203637                             | 0.0473905 |
| CST3        | -3.340532152                            | 0.0013997 |
| CXCL14      | -3.424078607                            | 0.0041992 |
| EFEMP2      | -3.454651494                            | 0.0007998 |
| EGFR        | -3.137113429                            | 0.0183963 |
| F3          | -3.476184172                            | 0.0025995 |
| PLEKHC1     | -2.07588678                             | 0.0341932 |
| FOSL1       | -2.785883361                            | 0.0207958 |
| GADD45A     | -2.779385457                            | 0.0075985 |
| GPC1        | -2.322971826                            | 0.0195961 |
| GPC3        | 2.622970523                             | 0.0065987 |
| HES1        | -3.223661916                            | 0.0043991 |
| HOXD3       | 3.485212017                             | 0.0027994 |
| HRAS        | -2.152130097                            | 0.0255949 |
| HRH1        | -3.374215239                            | 0.0021996 |
| HSPB1       | -3.53423492                             | 0.0023995 |
| IGFBP3      | -2.465073791                            | 0.0175965 |
| ILK         | -2.64359854                             | 0.0119976 |
| ITGA7       | -3.384362156                            | 0.0025995 |
| JAK2        | 2.30072941                              | 0.0239952 |
| LGALS1      | -2.808324938                            | 0.0089982 |
| LGALS3      | -2.608794068                            | 0.0161968 |
| LIPA        | 2.873183885                             | 0.0189962 |
| LMO2        | -2.625914129                            | 0.0031994 |

|           |              |           |
|-----------|--------------|-----------|
| MAP2K6    | 3.244418545  | 0.0039992 |
| MEOX2     | -2.923125966 | 0.0095981 |
| MYB       | 2.095504172  | 0.0233953 |
| NPTX1     | -3.09163211  | 0.0083983 |
| NR2E1     | -3.399811199 | 0.0023995 |
| PDE3B     | 2.884544863  | 0.0017996 |
| PDGFA     | -2.831740636 | 0.0039992 |
| PLA2G4A   | 2.572601932  | 0.0233953 |
| PLA2G7    | 2.091509599  | 0.030194  |
| PLOD3     | -2.08089199  | 0.029994  |
| PPP1R16B  | 2.026483923  | 0.0413917 |
| PTGIR     | 2.135968139  | 0.0425915 |
| PTX3      | -2.952370297 | 0.0075985 |
| RAMP1     | -4.073950378 | 0.0011998 |
| SCG2      | -4.722590298 | 0.0002    |
| SDC4      | -2.320790458 | 0.0295941 |
| SEMA3E    | 2.900404806  | 0.0031994 |
| SERPINA3  | -2.190559166 | 0.005199  |
| SERPINE1  | -2.328293313 | 0.0333933 |
| SPRY2     | -2.886663201 | 0.0033993 |
| TFPI      | 2.59539073   | 0.0145971 |
| TGFB2     | -2.360288855 | 0.0363927 |
| TGFBR1    | 2.01327967   | 0.0475905 |
| THBS4     | -2.537202323 | 0.0325935 |
| TIMP1     | -2.26244782  | 0.0277944 |
| TNC       | -2.247177986 | 0.0061988 |
| TNFRSF12A | -2.860784104 | 0.0041992 |
| TNFRSF1A  | -3.083352028 | 0.0043991 |
| TNFSF12   | -2.78244406  | 0.0129974 |
| VAV3      | -3.495292988 | 0.0055989 |
| WNT7A     | -4.539703641 | 0.0009998 |

Supplementary Table 6: Invasion related genes and their expression fold change in *PTEN* mutant vs WT analysis.

| Gene Symbol | Fold Change ( <i>PTEN</i> mutant vs WT) | p-value   |
|-------------|-----------------------------------------|-----------|
| ABL2        | 2.636285039                             | 0.0039992 |
| ARHGAP4     | 2.598181631                             | 0.009798  |
| BMPR2       | -2.569840785                            | 0.0369926 |
| CCL2        | 2.645094224                             | 0.0195961 |
| CCNB1IP1    | -3.109560351                            | 0.0107978 |
| CCR1        | 2.509039248                             | 0.0267946 |
| CD14        | 2.739575851                             | 0.0171966 |
| CDKN1B      | -2.427779561                            | 0.0161968 |
| CHI3L1      | 3.159086715                             | 0.0321936 |
| CTSB        | 2.212253726                             | 0.0329934 |
| CTSL1       | 2.309099054                             | 0.0315937 |
| CTSZ        | 4.219885895                             | 0.0031994 |
| EGFR        | -4.247239724                            | 0.0059988 |
| EIF3E       | -2.796862618                            | 0.0125975 |
| FHOD1       | 3.320177564                             | 0.0077984 |
| FOXO1       | -2.677219461                            | 0.0221956 |
| GAB1        | -2.585765885                            | 0.040192  |
| GALNT2      | 2.25947635                              | 0.04979   |
| GATA3       | 2.021558674                             | 0.0255949 |
| GLI1        | -2.243031373                            | 0.0273945 |
| GRB2        | 2.775276975                             | 0.0063987 |
| HBP1        | -3.199743671                            | 0.0037992 |
| HMOX1       | 2.795080359                             | 0.0143971 |
| ITGA5       | 2.23455148                              | 0.0423915 |
| LGALS1      | 2.701150835                             | 0.0281944 |
| LOXL2       | 2.474330004                             | 0.0327934 |
| MAP4K1      | 2.262533955                             | 0.0325935 |
| MST1        | -2.490067194                            | 0.0419916 |
| NANOG       | -2.872657742                            | 0.0315937 |
| NF1         | -2.647577303                            | 0.0243951 |
| NQO1        | 2.905906278                             | 0.0059988 |
| NRG1        | 2.372004999                             | 0.0257948 |
| PKM2        | 2.06144561                              | 0.0469906 |
| PLA2R1      | 2.999249772                             | 0.0107978 |
| PLAUR       | 2.516127782                             | 0.0187962 |
| PRKCE       | -2.409589285                            | 0.0495901 |
| RGS4        | 2.825602801                             | 0.0035993 |
| RPS6KA1     | 2.746673097                             | 0.0095981 |
| S100A11     | 2.743491595                             | 0.0323935 |
| SERPINA1    | 2.596075057                             | 0.0267946 |
| SPHK1       | 2.081632704                             | 0.0369926 |
| SPI1        | 2.226303917                             | 0.024795  |
| ST14        | 2.391146521                             | 0.0207958 |
| SYK         | 2.299076705                             | 0.0307938 |
| TCIRG1      | 2.412904974                             | 0.0233953 |



|        |              |           |
|--------|--------------|-----------|
| THBD   | 2.257518805  | 0.0325935 |
| TIMP1  | 2.655740371  | 0.0267946 |
| TRPV2  | 2.361178937  | 0.0205959 |
| WAS    | 2.696393462  | 0.009798  |
| ZBTB16 | -2.223212965 | 0.029994  |

Supplementary Table 7: Immune response related genes and their expression fold change in *EGFR* mutant vs WT analysis.

| Gene Symbol | Fold Change ( <i>EGFR</i> mutant vs WT) | p-value     |
|-------------|-----------------------------------------|-------------|
| ABL2        | -2.261445119                            | 0.048790242 |
| ANXA5       | 2.170962121                             | 0.042391522 |
| AQP4        | 2.073586478                             | 0.046390722 |
| CCR7        | -2.083351078                            | 0.035792841 |
| CD1D        | -2.293432429                            | 0.044791042 |
| CD244       | -2.500278487                            | 0.019796041 |
| CD36        | -2.347258622                            | 0.016196761 |
| CST3        | 2.269495709                             | 0.042191562 |
| EGFR        | 6.705430388                             | 0.00019996  |
| FOXO1       | 2.618086544                             | 0.016396721 |
| GULP1       | -3.463249888                            | 0.00459908  |
| IL6         | -2.671598208                            | 0.022995401 |
| LTF         | 2.5138482                               | 0.023195361 |
| MSR1        | -2.465887094                            | 0.022195561 |
| OTUB2       | -2.461761351                            | 0.027994401 |
| PLA2G4A     | -2.31737271                             | 0.031993601 |
| PLCG1       | 2.356276128                             | 0.030393921 |
| RORA        | 2.133721934                             | 0.044391122 |
| SGK         | -3.094596683                            | 0.00619876  |
| SPRY1       | 2.31412034                              | 0.037792442 |
| SPRY2       | 2.819223652                             | 0.014997001 |
| TLR8        | -2.001599825                            | 0.030393921 |
| TNFSF10     | -2.749936026                            | 0.01059788  |
| TNPO1       | 2.308019517                             | 0.032993401 |
| USE1        | 2.457261056                             | 0.022995401 |
| XRCC1       | 2.365609124                             | 0.026394721 |
